# Supplementary material for: A Competitive “On-Off-Enhanced On” AIE Fluorescence Switch for Detecting Biothiols Based on Hg2+ Ions and Gold Nanoclusters
Source: MDPI journal article supplement (doi:10.3390/bios13010035), 2022-12-27
Supplement: s1 [file s1]

## Supporting information

# A Competitive “On-Off-Enhanced On” AIE Fluorescence Switch for Detecting Biothiols Based on Hg<sup>2+</sup> Ions and Gold Nanoclusters

Shuqi Li <sup>1,2,†</sup>, Yuqi Wan <sup>1,2,†</sup>, Yu Li <sup>1,2</sup>, Jinghan Liu <sup>1,2</sup>, Fuwei Pi <sup>1,2,\*</sup> and Ling Liu <sup>3,\*</sup>

<sup>1</sup> State Key Laboratory of Food Science and Technology, School of Food Science and Technology, Jiangnan University, Wuxi 214122, China; lsq14124869@163.com (S.L.); yuqiwan07@163.com (Y.W.); m18015366421@163.com (Y.L.); jinghanliu55@foxmail.com (J.L.)

<sup>2</sup> Collaborative Innovation Center of Food Safety and Quality Control in Jiangsu Province, Jiangnan University, Wuxi 214122, China

<sup>3</sup> Wuxi Institute of Technology, Wuxi 214122, China

\* Correspondence: pifuwei@jiangnan.edu.cn (F.P.); liulin@wxit.edu.cn (L.L.);

† These authors contributed equally to this work.

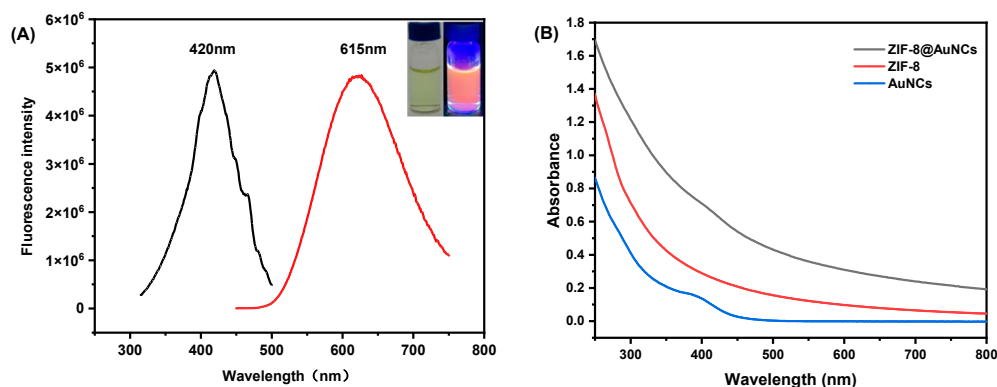

**Figure S1.** (A) Fluorescence excitation and emission spectra of as-prepared GSH-AuNCs. (B) UV-vis spectra of ZIF-8, AuNCs and AuNCs/ZIF-8

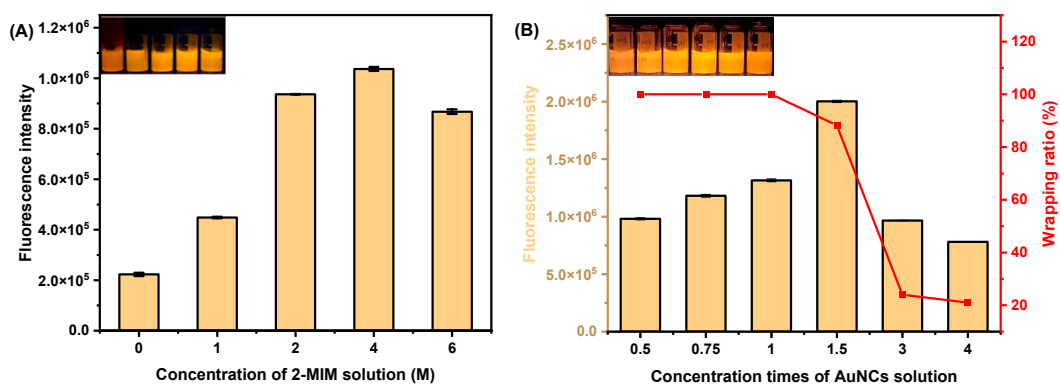

**Figure S2.** The fluorescence emission spectra of AuNCs/ZIF-8 synthesized from (A) different concentration of 2-MIM solution and (B) different concentration times of AuNCs solution. The red broken line represents the coverage of AuNCs.

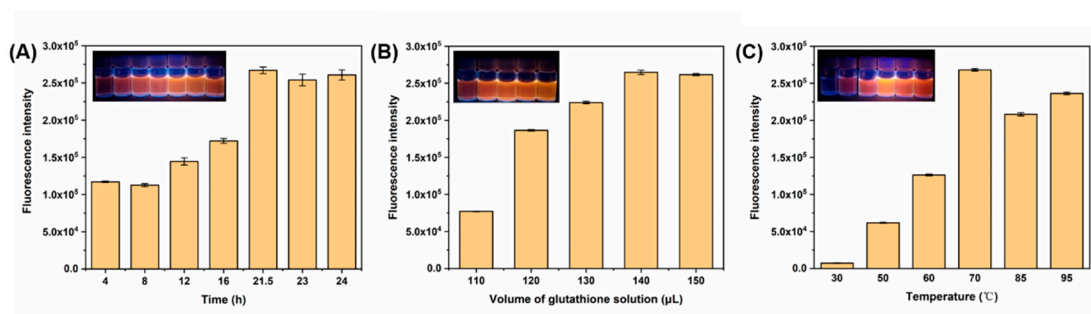

**Figure S3.** The effect of (A) synthesis time (B) Volume of GSH solution and (C) synthetic temperature on the fluorescence intensity of AuNCs.
